# Supplementary material for: Generalized spatiotemporally-decoupled framework for reconstructing the source of non-constant atmospheric radionuclide releases
Source: Copernicus journal article supplement (doi:10.5194/gmd-2023-173), 2023-11-27
Supplement: Supplementary file 1 [file gmd-2023-173-supplement.pdf]

1 **Generalized spatiotemporally-decoupled framework for**  
2 **reconstructing the source of non-constant atmospheric radionuclide**  
3 **releases**

4 Yuhan Xu<sup>1</sup>, Sheng Fang<sup>1,\*</sup>, Xinwen Dong<sup>1</sup>, Shuhan Zhuang<sup>1</sup>

5 <sup>1</sup>Institute of Nuclear and New Energy Technology, Collaborative Innovation Centre of Advanced Nuclear Energy Technology,  
6 Key Laboratory of Advanced Reactor Engineering and Safety of Ministry of Education, Tsinghua University, Beijing 100084,  
7 China

8 \*Correspondence to: Sheng Fang (fangsheng@tsinghua.edu.cn)

9 This supplementary material (9 pages) includes 1 Note, 5 Figures, 1 Tables and 2 References.

10 **Note S1: Bayesian method for source reconstruction**

11 The Bayesian method is combined with Markov chain Monte Carlo sampling to estimate the source location and release rate  
 12 simultaneously. Bayes' theorem can be expressed as:

$$13 \quad p(\mathbf{s}|\boldsymbol{\mu}) = \frac{p(\boldsymbol{\mu}|\mathbf{s})p(\mathbf{s})}{p(\boldsymbol{\mu})} \propto p(\boldsymbol{\mu}|\mathbf{s})p(\mathbf{s}), \quad (\text{S1})$$

14 where  $\mathbf{s}$  is the parameter vector containing source parameters and  $\boldsymbol{\mu}$  is an observation vector.  $p(\mathbf{s})$  describes the probability  
 15 distribution of prior knowledge on  $\mathbf{s}$  and  $p(\boldsymbol{\mu}|\mathbf{s})$  is the likelihood function quantifying the goodness of fit between the  
 16 simulations and observations. Consistent with general approaches, we define  $p(\mathbf{s})$  as the uniform distribution bounded by the  
 17 lower and upper limits of the source parameters. Referring to (Dumont Le Brazidec et al., 2021),  $p(\boldsymbol{\mu}|\mathbf{s})$  is defined as the log-  
 18 Cauchy distribution:

$$19 \quad p(\boldsymbol{\mu}|\mathbf{s}) = -\sum_{i=1}^o \ln \left\{ r + \left[ \ln(\mu_i + \mu_t) - \ln \left( (\mathbf{F}(\mathbf{s}))_i + \mu_t \right) \right]^2 \right\} + \frac{1}{2} \ln(r), \quad (\text{S2})$$

20 where  $r$  is a covariance parameter which forms the covariance matrix  $\mathbf{R} = r\mathbf{I}$  and  $\mu_t$  is a positive threshold that ensures the  
 21 logarithm is defined properly for zero measurements or simulations.

22 However, the release rate is time-varied, so it is not realistic to define the prior distribution of the release rate in every time  
 23 step. Hence, we incorporate the source inversion method into this process, which involves calculating the corresponding release  
 24 rate for the sampled source location and then obtaining Eq. (S3) using the sampled location and calculated release rate. We  
 25 apply a traditional Tikhonov method to calculate the release rate as follows:

$$26 \quad \mathbf{q}(\mathbf{r}) = \operatorname{argmin} \left( \frac{1}{2} \|\boldsymbol{\mu} - \mathbf{A}(\mathbf{r})\mathbf{q}\|_2^2 + \frac{1}{2} \lambda^2 \|\mathbf{q}\|_2^2 \right), \quad (\text{S3})$$

27 where  $\mathbf{q}(\mathbf{r})$  refers to the estimated release rate vector under the source location  $\mathbf{r}$  and  $\mathbf{A}(\mathbf{r})$  refers to the source–receptor matrix  
 28 given  $\mathbf{r}$ .  $\lambda$  is a regularization parameter that is automatically selected by generalized cross-validation (Hansen and O'Leary,  
 29 1993).

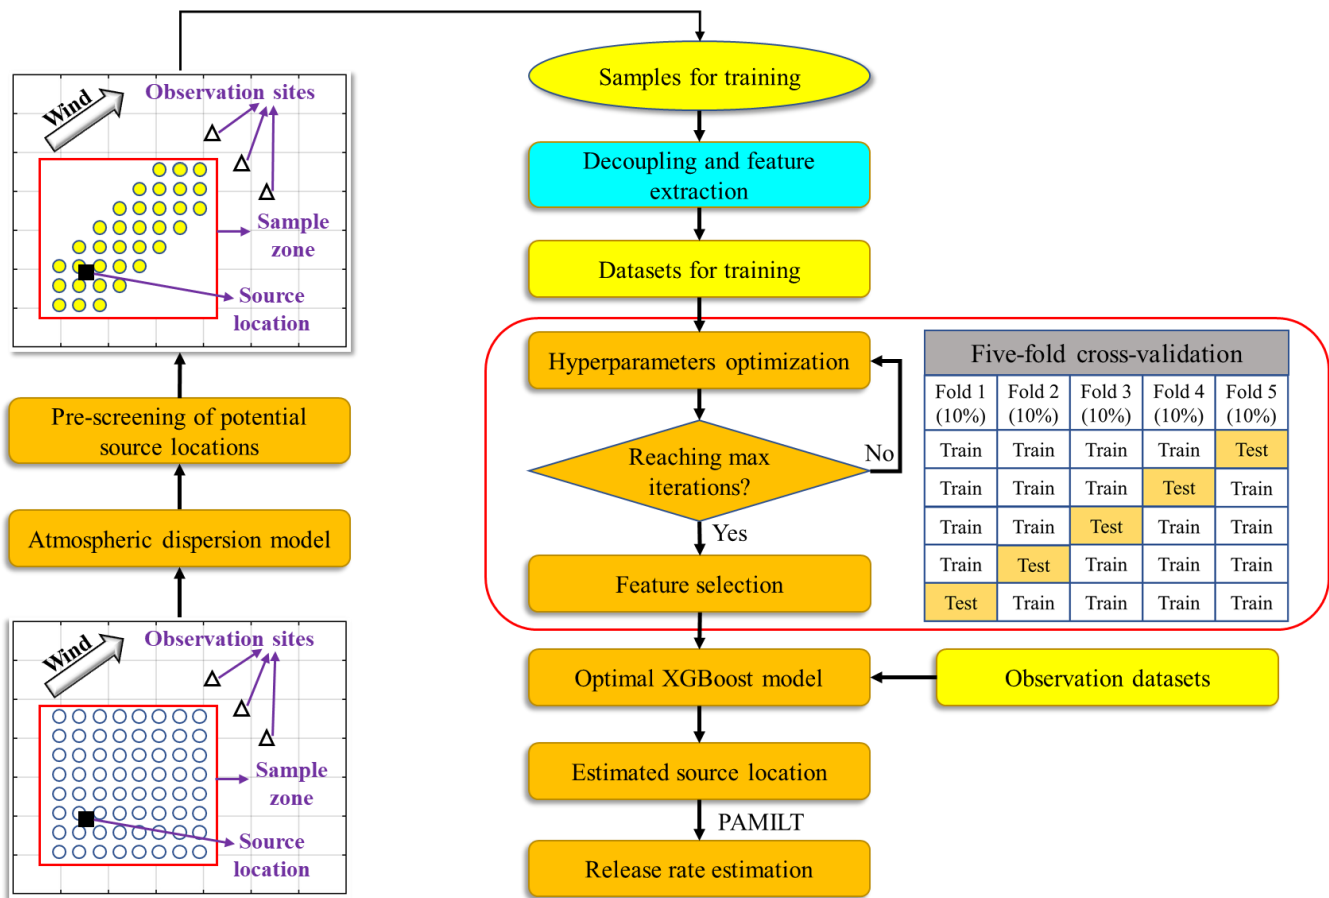

Figure S1. Flowchart of the proposed spatiotemporally decoupled source reconstruction method.

30  
31  
32  
33  
34  
35  
36  
37

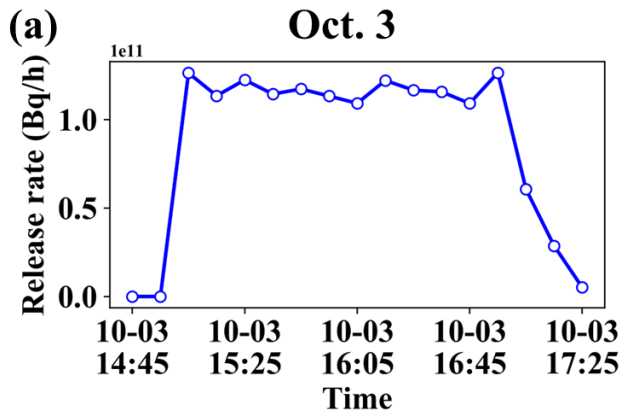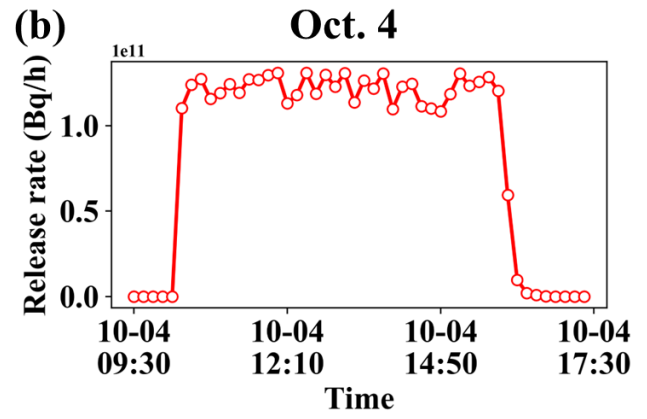

38

39 **Figure S2.** Synthetic release rates for generating synthetic observations. (a) Oct. 3; (b) Oct. 4.

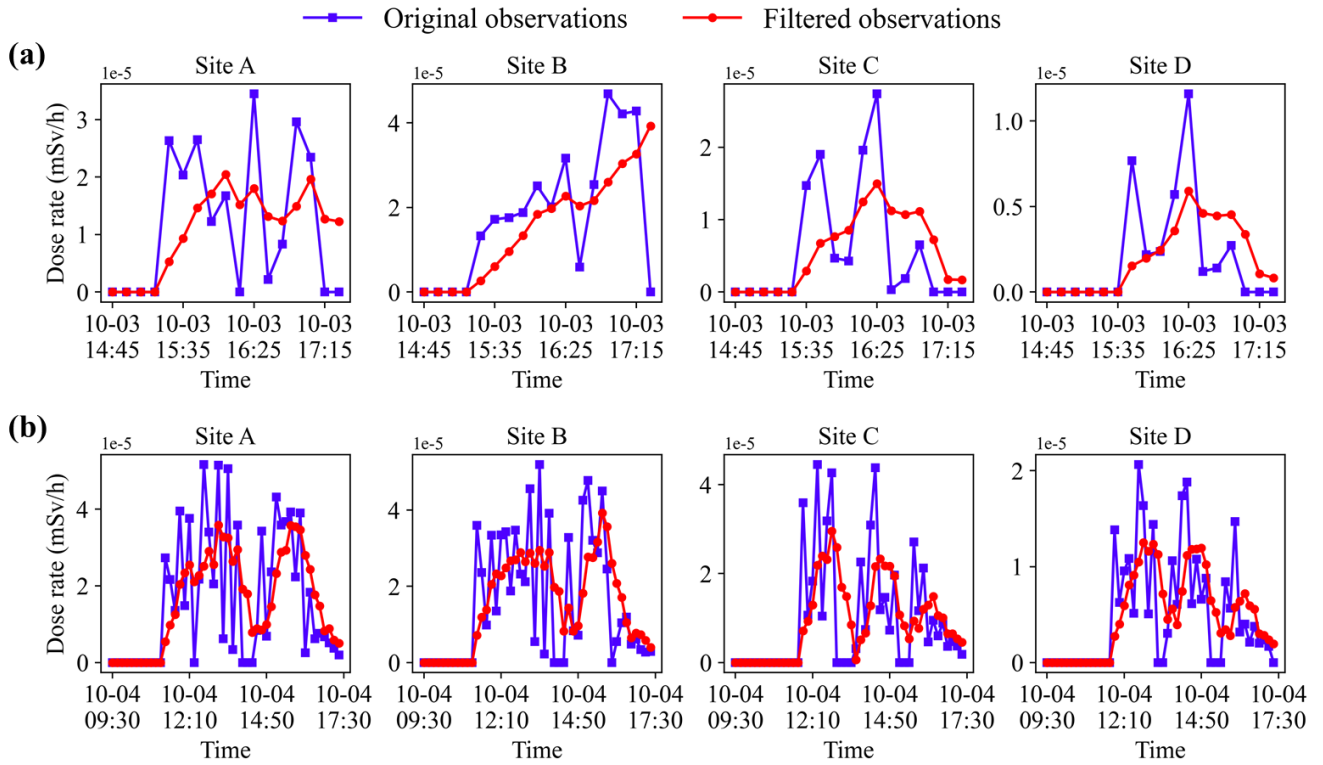

40

41 **Figure S3.** Observations before and after filtering at observation sites. (a) Oct. 3; (b) Oct. 4.

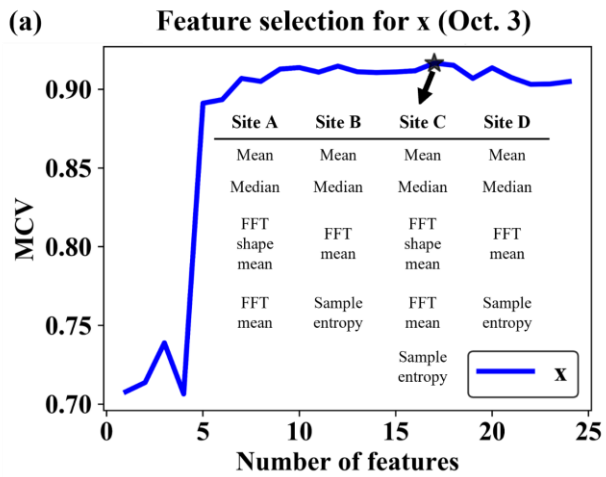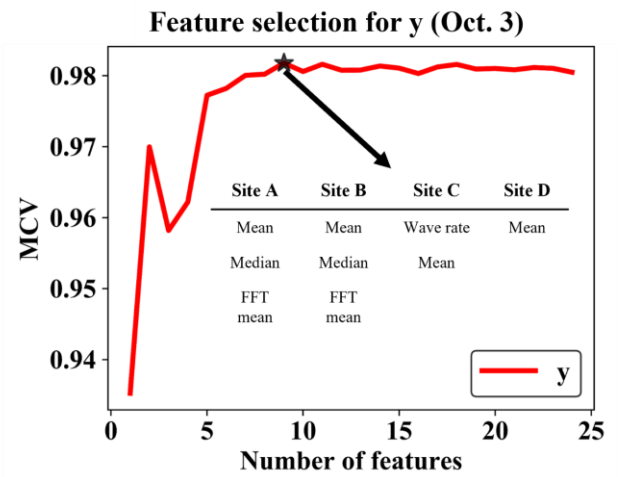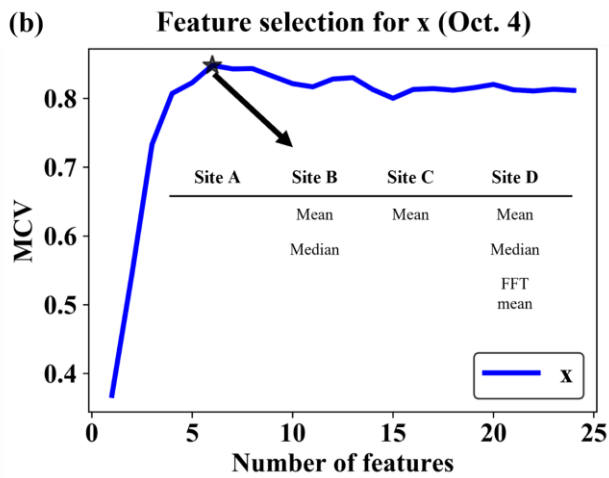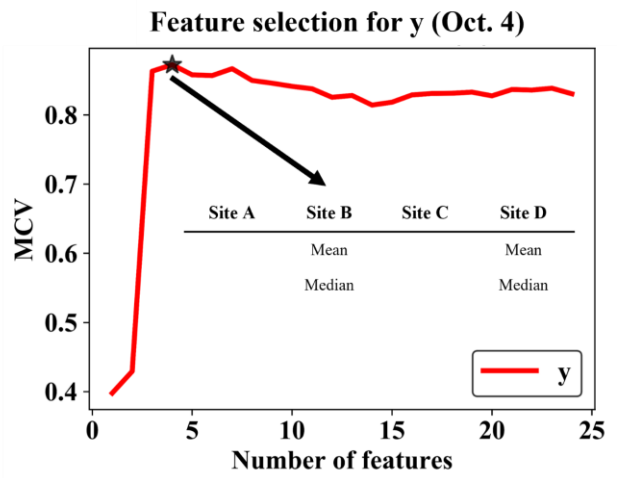

42

43 **Figure S4.** Results of feature selection in x and y directions. (a) Oct. 3; (b) Oct. 4. The black stars denote the optimal number  
 44 of features. The table inserted in each subgraph lists the selected features for each observation site.

45

(a)

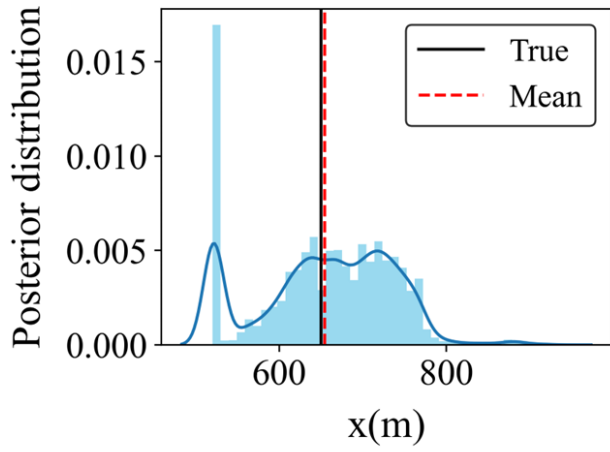

Oct. 3

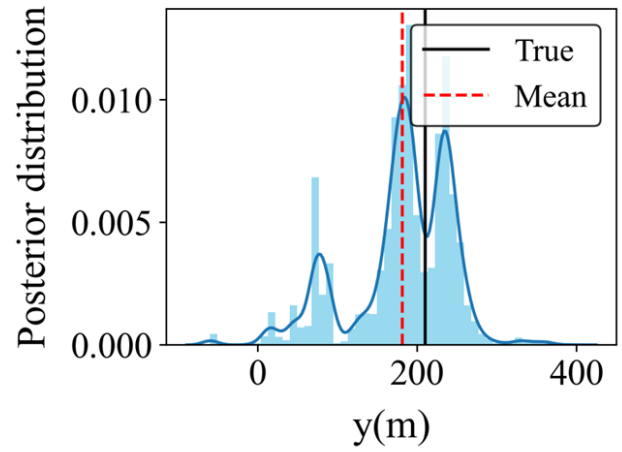

(b)

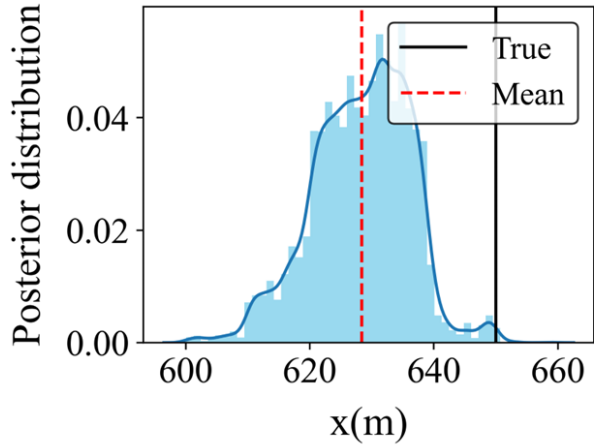

Oct. 4

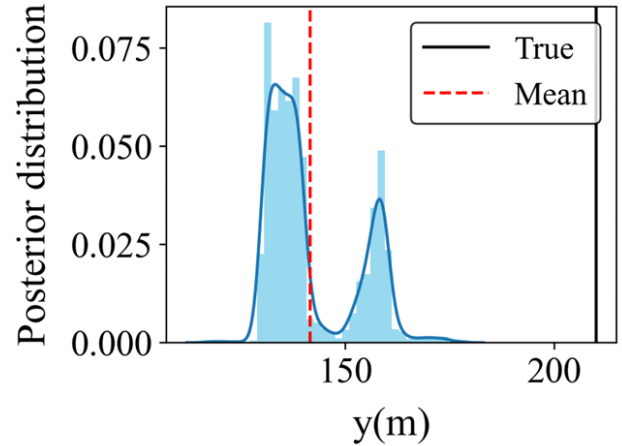

46

47 **Figure S5.** Posterior distributions of source location parameters. (a) Oct. 3; (b) Oct. 4. The black solid lines denote the true location  
48 parameters and the dashed lines denote the mean estimates of all posterior samples.

49

50

51 **Table S1.** Hyperparameter optimization results.

| Optimization results |                                    | Experiment |         |
|----------------------|------------------------------------|------------|---------|
|                      |                                    | Oct. 3     | Oct. 4  |
| Hyperparameters      | <i>max_depth</i> ([3,8])           | 6          | 7       |
|                      | <i>learning_rate</i> ([0.05,0.3])  | 0.05747    | 0.05199 |
|                      | <i>n_estimators</i> ([50,300])     | 291        | 199     |
|                      | <i>min_child_weight</i> ([2,10])   | 5          | 10      |
|                      | <i>subsample</i> ([0.5,1])         | 0.64408    | 0.69456 |
|                      | <i>colsample_bytree</i> ([0.01,1]) | 0.63517    | 0.99868 |
|                      | <i>reg_lambda</i> ([0.01,5])       | 2.44598    | 4.27874 |
|                      | <i>gamma</i> ([0.01,1])            | 0.99061    | 0.85555 |
| Optimal GC           |                                    | 0.01299    | 0.05104 |

52



53 **References**

54 Dumont Le Brazidec, J., Bocquet, M., Saunier, O., and Roustan, Y.: Quantification of uncertainties in the assessment of an  
55 atmospheric release source applied to the autumn 2017 106Ru event, *Atmos. Chem. Phys.*, 21, 13247–13267,  
56 <https://doi.org/10.5194/acp-21-13247-2021>, 2021.

57 Hansen, P. C. and O’Leary, D. P.: The Use of the L-Curve in the Regularization of Discrete Ill-Posed Problems, *SIAM J.*  
58 *Sci. Comput.*, 14, 1487–1503, <https://doi.org/10.1137/0914086>, 1993.

59
